# Supplementary material for: Childhood lead exposure is associated with lower cognitive functioning at older ages
Source: PubMed Central journal article supplement — Sci Adv. 2022 Nov 9;8(45):eabn5164. doi: 10.1126/sciadv.abn5164 (PMC9645703; doi:10.1126/sciadv.abn5164), 2022-11-09
Supplement: sciadv.abn5164_sm.pdf [file sciadv.abn5164_sm.pdf]

Supplementary Materials for  
**Childhood lead exposure is associated with lower cognitive functioning at  
older ages**

Haena Lee *et al.*

Corresponding author: Haena Lee, haenalee@skku.edu

*Sci. Adv.* **8**, eabn5164 (2022)  
DOI: 10.1126/sciadv.abn5164

**This PDF file includes:**

Tables S1 to S9  
Fig. S1

**Table S1. Growth curve modeling predicting cognitive function by childhood lead exposure, adult education and health outcomes, Health and Retirement Study, 1998-2016 (N=7,432 person-wave observations). AIC = Akaike information criterion; BIC = Bayesian information criterion; ref. = reference; \*p < .05. \*\*p < .01. \*\*\*p < .001**

|                                             | Model 0         |               | Model 1         |         | Model 2        |        | Model 3        |        | Model 4        |         |
|---------------------------------------------|-----------------|---------------|-----------------|---------|----------------|--------|----------------|--------|----------------|---------|
|                                             | Intercept       | Slope         | Intercept       | Slope   | Intercept      | Slope  | Intercept      | Slope  | Intercept      | Slope   |
| <i>Fixed Effects</i>                        |                 |               |                 |         |                |        |                |        |                |         |
| Age (centered)                              | -0.050***       |               | -0.050***       |         | -0.049***      |        | -0.062***      |        | -0.066***      |         |
| Age-squared                                 | -0.001***       |               | -0.001***       |         | -0.001***      |        | -0.001***      |        | -0.001***      |         |
| Lead                                        | 0.075           | 0.002         | 0.087           | 0.002   | 0.054          | 0.002  | 0.066          | 0.002  | 0.063          | 0.001   |
| Acidic/Alkaline Water                       | 0.083           | 0.010         | 0.112           | 0.009   | 0.096          | 0.012  | 0.097          | 0.010  | 0.106          | 0.011   |
| <b>Lead X Acidic/Alkaline Water</b>         | <b>-0.361**</b> | <b>-0.006</b> | <b>-0.408**</b> | -0.006  | <b>-0.268*</b> | -0.009 | <b>-0.261*</b> | -0.006 | <b>-0.271*</b> | -0.005  |
| Educational Attainment (ref.= <High School) |                 |               |                 |         |                |        |                |        |                |         |
| High School                                 |                 |               |                 |         | 0.491***       | -0.005 | 0.448***       | -0.006 | 0.453***       | -0.005  |
| Some College                                |                 |               |                 |         | 0.693***       | -0.003 | 0.624***       | -0.006 | 0.627***       | -0.005  |
| College +                                   |                 |               |                 |         | 0.955***       | 0.001  | 0.829***       | -0.005 | 0.830***       | -0.004  |
| Income                                      |                 |               |                 |         |                |        | 0.019***       | 0.001  | 0.019***       | 0.001   |
| Wealth                                      |                 |               |                 |         |                |        | 0.024***       | 0.001* | 0.023***       | 0.002*  |
| Stroke                                      |                 |               |                 |         |                |        |                |        | -0.156**       | -0.009  |
| Hypertension                                |                 |               |                 |         |                |        |                |        | 0.014          | 0.010** |
| Heart diseases                              |                 |               |                 |         |                |        |                |        | 0.011          | 0.000   |
| <i>Covariates</i>                           |                 |               |                 |         |                |        |                |        |                |         |
| Female                                      | 0.133**         | -0.004        | 0.136**         | -0.004  | 0.201***       | -0.004 | 0.217***       | -0.002 | 0.211***       | -0.002  |
| Race/Ethnicity (ref.=NH-White)              |                 |               |                 |         |                |        |                |        |                |         |
| Non-Hispanic, Black                         | -0.582***       | -0.015*       | -0.513***       | -0.015* | -0.424***      | -0.014 | -0.344***      | -0.009 | -0.358***      | -0.011  |
| Hispanic                                    | -0.268          | -0.005        | -0.284*         | -0.004  | -0.168         | -0.004 | -0.132         | -0.003 | -0.141         | -0.003  |
| Other                                       | -0.497*         | -0.001        | -0.512*         | -0.000  | -0.169         | 0.001  | -0.130         | 0.005  | -0.138         | 0.009   |
| Childhood SES (ref.=0)                      |                 |               |                 |         |                |        |                |        |                |         |
| 1                                           |                 |               | -0.037          | -0.001  | 0.045          | -0.001 | 0.045          | -0.001 | 0.046          | -0.001  |
| 2                                           |                 |               | -0.097          | 0.003   | 0.084          | 0.005  | 0.084          | 0.005  | 0.083          | 0.006   |
| 3+                                          |                 |               | -0.014          | -0.002  | 0.171**        | -0.002 | 0.176**        | -0.001 | 0.169**        | -0.002  |
| Poor Childhood Health                       |                 |               | -0.161          | 0.001   | -0.083         | 0.002  | -0.064         | 0.003  | -0.060         | 0.003   |
| Southern Born                               |                 |               | -0.156**        | 0.003   | -0.109*        | 0.003  | -0.109*        | 0.004  | -0.094         | 0.004   |
| Intercept                                   | 0.289***        |               | 0.341***        |         | -0.389***      |        | -0.608***      |        | -0.599***      |         |
| <i>Variance components</i>                  |                 |               |                 |         |                |        |                |        |                |         |
| Variance of random intercept                | 0.378***        |               | 0.373***        |         | 0.298***       |        | 0.288***       |        | 0.283***       |         |
| Variance of random slope                    | 0.001***        |               | 0.001***        |         | 0.001***       |        | 0.001***       |        | 0.001***       |         |
| Residual variance                           | 0.313***        |               | 0.313***        |         | 0.313***       |        | 0.312***       |        | 0.312***       |         |
| <i>Goodness-of-fit</i>                      |                 |               |                 |         |                |        |                |        |                |         |
| AIC                                         | 15255.47        |               | 15258.05        |         | 15070.48       |        | 15022.62       |        | 15004.94       |         |
| BIC                                         | 15400.65        |               | 15472.37        |         | 15326.28       |        | 15306.08       |        | 15329.87       |         |

**Table S2. Logit and OLS predicting differences in adult education, SES and cardiovascular health outcomes by childhood lead exposure, Health and Retirement Study, 1998**

(N=1,089). <sup>a</sup> High school or more is reference group. All models adjust for age, sex and race/ethnicity. Because our growth curve results only identified level differences in cognitive performance by childhood lead exposure, not slope differences in the rate of cognitive change, we fit models with adulthood SES and health outcomes at baseline.

\*p<0.05; \*\*p<0.01; \*\*\*p<0.001.

|                                         | Less than<br>High School <sup>a</sup> | Income       | Wealth         |
|-----------------------------------------|---------------------------------------|--------------|----------------|
|                                         | OR                                    | Beta         | Beta           |
| Lead                                    | 0.701                                 | -0.610***    | -0.037         |
| Acidic/Alkaline Water                   | 0.677                                 | -0.569       | -0.438         |
| <b>Lead X Acidic/Alkaline<br/>Water</b> | <b>4.663*</b>                         | 0.466        | 0.146          |
| Constant                                | 0.019                                 | 13.478       | 4.245          |
| R <sup>2</sup>                          | 0.110***                              | 0.129***     | 0.128***       |
|                                         | Stroke                                | Hypertension | Heart Diseases |
|                                         | OR                                    | OR           | OR             |
| Lead                                    | 1.180                                 | 1.029        | 1.058          |
| Acidic/Alkaline Water                   | 2.347                                 | 0.804        | 1.023          |
| Lead X Acidic/Alkaline Water            | 0.391                                 | 0.855        | 1.094          |
| Constant                                | 0.002                                 | 0.065**      | 0.000          |
| R <sup>2</sup>                          | 0.056*                                | 0.027***     | 0.062**        |

**Table S3. Decomposition of the effect of childhood lead exposure on cognitive functioning using the Karlson, Holm and Breen method, Health and Retirement Study (N=1,089).** Note: We included all the proposed mediators in one model and compared it with the restricted model that accounts for childhood lead exposure and covariates including age, sex, race/ethnicity, childhood SES, childhood health and place of birth. Because our growth curve results only identified level differences in cognitive performance by childhood lead exposure, not slope differences in the rate of cognitive change, we fit models with adulthood SES and health outcomes at baseline. \*p<0.05; \*\*p<0.01; \*\*\*p<0.001.

|                                                                                          | %      |
|------------------------------------------------------------------------------------------|--------|
| Decomposition of total effect of childhood lead exposure on cognitive functioning        |        |
| Total effect                                                                             | -      |
| Direct effect                                                                            | 74.31% |
| Indirect effect                                                                          | 25.69% |
| Decomposition of indirect effect by educational, SES, and cardiovascular health pathways |        |
| Education pathway                                                                        | 24.28% |
| Income pathway                                                                           | 1.00%  |
| Wealth pathway                                                                           | 2.16%  |
| Stroke pathway                                                                           | -0.07% |
| Hypertension pathway                                                                     | -1.46% |
| Heart disease pathway                                                                    | -0.22% |

**Table S4. Growth curve modeling predicting cognitive function by childhood lead exposure, adult education and health outcomes with the stricter specification of acidic water (pH ≤ 6.4) and alkaline water (pH ≥ 8.6), Health and Retirement Study, 1998-2016 (N=7,432 person-wave observations). AIC = Akaike information criterion; BIC = Bayesian information criterion; ref. = reference; \*p < .05. \*\*p < .01. \*\*\*p < .001.**

|                                                       | Model 0        |         | Model 1        |         | Model 2        |        | Model 3        |        | Model 4        |         |
|-------------------------------------------------------|----------------|---------|----------------|---------|----------------|--------|----------------|--------|----------------|---------|
|                                                       | Intercept      | Slope   | Intercept      | Slope   | Intercept      | Slope  | Intercept      | Slope  | Intercept      | Slope   |
| <i>Fixed Effects</i>                                  |                |         |                |         |                |        |                |        |                |         |
| Age (centered)                                        | -0.049***      |         | -0.049***      |         | -0.048***      |        | -0.061***      |        | -0.065***      |         |
| Age-squared                                           | -0.001***      |         | -0.001***      |         | -0.001***      |        | -0.001***      |        | -0.001***      |         |
| Lead                                                  | 0.064          | 0.002   | 0.073          | 0.002   | 0.047          | 0.001  | 0.061          | 0.001  | 0.057          | 0.001   |
| Acidic/Alkaline Water                                 | 0.089          | 0.001   | 0.123          | 0.001   | 0.103          | 0.003  | 0.104          | 0.001  | 0.123          | 0.002   |
| <b>Lead X Acidic/Alkaline Water</b>                   | <b>-0.374*</b> | -0.000  | <b>-0.423*</b> | -0.001  | <b>-0.287+</b> | -0.001 | <b>-0.292+</b> | 0.002  | <b>-0.307*</b> | 0.002   |
| <i>Educational Attainment (ref.= &lt;High School)</i> |                |         |                |         |                |        |                |        |                |         |
| High School                                           |                |         |                |         | 0.497***       | -0.005 | 0.454***       | -0.007 | 0.459***       | -0.005  |
| Some College                                          |                |         |                |         | 0.699***       | -0.003 | 0.628***       | -0.006 | 0.632***       | -0.005  |
| College +                                             |                |         |                |         | 0.959***       | 0.001  | 0.831***       | -0.006 | 0.832***       | -0.004  |
| Income                                                |                |         |                |         |                |        | 0.019***       | 0.001  | 0.019***       | 0.001   |
| Wealth                                                |                |         |                |         |                |        | 0.024*         | 0.001* | 0.023**        | 0.002*  |
| Stroke                                                |                |         |                |         |                |        |                |        | -0.156**       | -0.010  |
| Hypertension                                          |                |         |                |         |                |        |                |        | 0.014          | 0.010** |
| Heart diseases                                        |                |         |                |         |                |        |                |        | 0.010          | 0.000   |
| <i>Covariates</i>                                     |                |         |                |         |                |        |                |        |                |         |
| Female                                                | 0.133**        | -0.004  | 0.136**        | -0.004  | 0.200***       | -0.004 | 0.217***       | -0.002 | 0.211***       | -0.002  |
| <i>Race/Ethnicity (ref.=NH-White)</i>                 |                |         |                |         |                |        |                |        |                |         |
| Non-Hispanic, Black                                   | -0.582***      | -0.015* | -0.516***      | -0.016* | -0.426***      | -0.014 | -0.345***      | -0.009 | -0.359***      | -0.011  |
| Hispanic                                              | -0.270         | -0.005  | -0.287*        | -0.005  | -0.172         | -0.004 | -0.136         | -0.003 | -0.144         | -0.004  |
| Other                                                 | -0.487*        | -0.000  | -0.505*        | 0.001   | -0.162         | 0.002  | -0.124         | 0.006  | -0.132         | 0.009   |
| <i>Childhood SES (ref.=0)</i>                         |                |         |                |         |                |        |                |        |                |         |
| 1                                                     |                |         | -0.037         | -0.001  | 0.045          | -0.001 | 0.045          | -0.001 | 0.046          | -0.001  |
| 2                                                     |                |         | -0.100         | 0.003   | 0.083          | 0.005  | 0.083          | 0.005  | 0.082          | 0.006   |
| 3+                                                    |                |         | -0.011         | -0.002  | 0.173**        | -0.002 | 0.178**        | -0.001 | 0.170**        | -0.002  |
| Poor Childhood Health                                 |                |         | -0.163*        | 0.001   | -0.085         | 0.001  | -0.066         | 0.003  | -0.062         | 0.003   |
| Southern Born                                         |                |         | -0.149**       | 0.002   | -0.105         | 0.003  | -0.104         | 0.004  | -0.090         | 0.004   |
| Intercept                                             | 0.290***       |         | 0.342***       |         | -0.393***      |        | -0.614***      |        | -0.604***      |         |
| <i>Variance components</i>                            |                |         |                |         |                |        |                |        |                |         |
| Variance of random intercept                          | 0.380**        |         | 0.374***       |         | 0.298***       |        | 0.288***       |        | 0.283***       |         |
| Variance of random slope                              | 0.001***       |         | 0.001***       |         | 0.001***       |        | 0.001***       |        | 0.001***       |         |
| Residual variance                                     | 0.313***       |         | 0.313***       |         | 0.313***       |        | 0.312***       |        | 0.312***       |         |
| <i>Goodness-of-fit</i>                                |                |         |                |         |                |        |                |        |                |         |
| AIC                                                   | 15258.99       |         | 15261.81       |         | 15072.51       |        | 15023.89       |        | 15006.47       |         |
| BIC                                                   | 15404.18       |         | 15476.13       |         | 15328.31       |        | 15307.34       |        | 15331.41       |         |

**Table S5. Growth curve modeling predicting cognitive function by childhood lead exposure, adult education and health outcomes with the inclusive specification of acidic water (pH ≤ 6.6) and alkaline water (pH ≥ 8.4), Health and Retirement Study, 1998-2016 (N=7,432 person-wave observations). AIC = Akaike information criterion; BIC = Bayesian information criterion; ref. = reference; \*p < .05. \*\*p < .01. \*\*\*p < .001.**

|                                                       | Model 0         |         | Model 1         |         | Model 2        |         | Model 3        |        | Model 4        |         |
|-------------------------------------------------------|-----------------|---------|-----------------|---------|----------------|---------|----------------|--------|----------------|---------|
|                                                       | Intercept       | Slope   | Intercept       | Slope   | Intercept      | Slope   | Intercept      | Slope  | Intercept      | Slope   |
| <i>Fixed Effects</i>                                  |                 |         |                 |         |                |         |                |        |                |         |
| Age (centered)                                        | -0.050***       |         | -0.050***       |         | -0.049***      |         | -0.095***      |        | -0.099***      |         |
| Age-squared                                           | -0.001***       |         | -0.001***       |         | -0.001***      |         | -0.001***      |        | -0.001***      |         |
| Lead                                                  | 0.079           | 0.002   | 0.090*          | 0.002   | 0.059          | 0.002   | 0.072          | 0.002  | 0.069          | 0.001   |
| Acidic/Alkaline Water                                 | 0.068           | 0.008   | 0.086           | 0.007   | 0.079          | 0.009   | 0.095          | 0.009  | 0.104          | 0.011   |
| <b>Lead X Acidic/Alkaline Water</b>                   | <b>-0.343**</b> | -0.006  | <b>-0.377**</b> | -0.005  | <b>-0.253*</b> | -0.007  | <b>-0.262*</b> | -0.006 | <b>-0.272*</b> | -0.006  |
| <i>Educational Attainment (ref.= &lt;High School)</i> |                 |         |                 |         |                |         |                |        |                |         |
| High School                                           |                 |         |                 |         | 0.490***       | -0.005  | 0.447***       | -0.007 | 0.452***       | -0.005  |
| Some College                                          |                 |         |                 |         | 0.693***       | -0.003  | 0.624***       | -0.007 | 0.628***       | -0.005  |
| College +                                             |                 |         |                 |         | 0.955***       | 0.001   | 0.828***       | -0.006 | 0.829***       | -0.004  |
| Income                                                |                 |         |                 |         |                |         | 0.019***       | 0.001  | 0.019***       | 0.001   |
| Wealth                                                |                 |         |                 |         |                |         | 0.024***       | 0.002* | 0.023***       | 0.002*  |
| Stroke                                                |                 |         |                 |         |                |         |                |        | -0.158***      | -0.010  |
| Hypertension                                          |                 |         |                 |         |                |         |                |        | 0.015          | 0.010** |
| Heart diseases                                        |                 |         |                 |         |                |         |                |        | 0.009          | 0.000   |
| <i>Covariates</i>                                     |                 |         |                 |         |                |         |                |        |                |         |
| Female                                                | 0.132**         | -0.004  | 0.135*          | -0.004  | 0.200***       | -0.004  | 0.217***       | -0.002 | 0.211***       | -0.002  |
| <i>Race/Ethnicity (ref.=NH-White)</i>                 |                 |         |                 |         |                |         |                |        |                |         |
| Non-Hispanic, Black                                   | -0.584***       | -0.015* | -0.514***       | -0.016* | -0.425***      | -0.014* | -0.345***      | -0.009 | -0.359***      | -0.011  |
| Hispanic                                              | -0.267          | -0.005  | -0.282*         | -0.004  | -0.167         | -0.004  | -0.130         | -0.002 | -0.138         | -0.003  |
| Other                                                 | -0.493*         | -0.001  | -0.506*         | 0.000   | -0.164         | 0.001   | -0.127         | 0.005  | -0.134         | 0.009   |
| <i>Childhood SES (ref.=0)</i>                         |                 |         |                 |         |                |         |                |        |                |         |
| 1                                                     |                 |         | -0.038          | -0.001  | 0.044          | -0.001  | 0.044          | -0.001 | 0.045          | -0.001  |
| 2                                                     |                 |         | -0.097          | 0.003   | 0.084          | 0.005   | 0.083          | 0.005  | 0.082          | 0.006   |
| 3+                                                    |                 |         | -0.013          | -0.002  | 0.172**        | -0.002  | 0.177**        | -0.001 | 0.170**        | -0.002  |
| Poor Childhood Health                                 |                 |         | -0.155          | 0.001   | -0.079         | 0.002   | -0.059         | 0.003  | -0.055         | 0.003   |
| Southern Born                                         |                 |         | -0.157**        | 0.002   | -0.111*        | 0.003   | -0.110*        | 0.003  | -0.096         | 0.004   |
| Intercept                                             | 0.286***        |         | 0.339***        |         | -0.392***      |         | -0.613***      |        | -0.604***      |         |
| <i>Variance components</i>                            |                 |         |                 |         |                |         |                |        |                |         |
| Variance of random intercept                          | 0.378***        |         | 0.373***        |         | 0.298***       |         | 0.288***       |        | 0.282***       |         |
| Variance of random slope                              | 0.001***        |         | 0.001***        |         | 0.001***       |         | 0.001***       |        | 0.001***       |         |
| Residual variance                                     | 0.313***        |         | 0.313***        |         | 0.313***       |         | 0.312***       |        | 0.312***       |         |
| <i>Goodness-of-fit</i>                                |                 |         |                 |         |                |         |                |        |                |         |
| AIC                                                   | 15255.75        |         | 15258.64        |         | 15070.53       |         | 15021.82       |        | 15003.66       |         |
| BIC                                                   | 15400.93        |         | 15472.96        |         | 15326.33       |         | 15305.28       |        | 15328.59       |         |

**Table S6. Growth curve modeling predicting cognitive function by childhood lead exposure, adult education and health outcomes with the inclusive specification of lead exposure (some lead pipes = 1), Health and Retirement Study, 1998-2016 (N=7,432 person-wave observations). AIC = Akaike information criterion; BIC = Bayesian information criterion; ref. = reference; \*p < .05. \*\*p < .01. \*\*\*p < .001.**

|                                                       | Model 0       |         | Model 1       |          | Model 2       |         | Model 3       |        | Model 4       |         |
|-------------------------------------------------------|---------------|---------|---------------|----------|---------------|---------|---------------|--------|---------------|---------|
|                                                       | Intercept     | Slope   | Intercept     | Slope    | Intercept     | Slope   | Intercept     | Slope  | Intercept     | Slope   |
| <i>Fixed Effects</i>                                  |               |         |               |          |               |         |               |        |               |         |
| Age (centered)                                        | -0.054***     |         | -0.055***     |          | -0.054***     |         | -0.067***     |        | -0.072***     |         |
| Age-squared                                           | -0.001***     |         | -0.001***     |          | -0.001***     |         | -0.001***     |        | -0.001***     |         |
| Lead                                                  | 0.063         | 0.007   | 0.041         | 0.008*   | 0.019         | 0.008*  | 0.022         | 0.008* | 0.019         | 0.007   |
| Acidic/Alkaline Water                                 | 0.068         | 0.003   | 0.073         | 0.003    | 0.046         | 0.006   | 0.041         | 0.005  | 0.052         | 0.005   |
| <b>Lead X Acidic/Alkaline Water</b>                   | <b>-0.266</b> | 0.003   | <b>-0.269</b> | 0.003    | <b>-0.146</b> | -0.000  | <b>-0.129</b> | 0.002  | <b>-0.140</b> | 0.003   |
| <i>Educational Attainment (ref.= &lt;High School)</i> |               |         |               |          |               |         |               |        |               |         |
| High School                                           |               |         |               |          | 0.499***      | -0.005  | 0.458***      | -0.006 | 0.464***      | -0.005  |
| Some College                                          |               |         |               |          | 0.702***      | -0.003  | 0.635***      | -0.006 | 0.638***      | -0.004  |
| College +                                             |               |         |               |          | 0.962***      | 0.002   | 0.839***      | -0.006 | 0.840***      | -0.004  |
| Income                                                |               |         |               |          |               |         | 0.019***      | 0.001* | 0.019***      | 0.001   |
| Wealth                                                |               |         |               |          |               |         | 0.024*        | 0.001* | 0.023**       | 0.002*  |
| Stroke                                                |               |         |               |          |               |         |               |        | -0.155**      | -0.009  |
| Hypertension                                          |               |         |               |          |               |         |               |        | 0.015         | 0.010** |
| Heart diseases                                        |               |         |               |          |               |         |               |        | 0.012         | 0.000   |
| <i>Covariates</i>                                     |               |         |               |          |               |         |               |        |               |         |
| Female                                                | 0.135**       | -0.005  | 0.139**       | -0.005   | 0.203***      | -0.004  | 0.220***      | -0.002 | 0.214***      | -0.002  |
| <i>Race/Ethnicity (ref.=NH-White)</i>                 |               |         |               |          |               |         |               |        |               |         |
| Non-Hispanic, Black                                   | -0.587***     | -0.015* | -0.528***     | -0.0167* | -0.433***     | -0.015* | -0.355***     | -0.011 | -0.368***     | -0.013  |
| Hispanic                                              | -0.282*       | -0.005  | -0.300*       | -0.004   | -0.177        | -0.004  | -0.143        | -0.003 | -0.152        | -0.003  |
| Other                                                 | -0.466*       | 0.0001  | -0.479*       | 0.002    | -0.138        | 0.003   | -0.096        | 0.007  | -0.104        | 0.011   |
| <i>Childhood SES (ref.=0)</i>                         |               |         |               |          |               |         |               |        |               |         |
| 1                                                     |               |         | -0.039        | -0.002   | 0.044         | -0.001  | 0.044         | -0.001 | 0.044         | -0.001  |
| 2                                                     |               |         | -0.090        | 0.003    | 0.089         | 0.005   | 0.089         | 0.005  | 0.089         | 0.006   |
| 3+                                                    |               |         | -0.009        | -0.002   | 0.175**       | -0.001  | 0.181**       | -0.001 | 0.173**       | -0.002  |
| Poor Childhood Health                                 |               |         | -0.161        | 0.001    | -0.083        | 0.001   | -0.063        | 0.003  | -0.059        | 0.003   |
| Southern Born                                         |               |         | -0.133**      | 0.005    | -0.095        | 0.006   | -0.093        | 0.006  | -0.080        | 0.007   |
| Intercept                                             | 0.273***      |         | 0.342***      |          | -0.392***     |         | -0.607***     |        | -0.599***     |         |
| <i>Variance components</i>                            |               |         |               |          |               |         |               |        |               |         |
| Variance of random intercept                          | 0.380**       |         | 0.375***      |          | 0.299***      |         | 0.289***      |        | 0.284***      |         |
| Variance of random slope                              | 0.001***      |         | 0.001***      |          | 0.001***      |         | 0.001***      |        | 0.001***      |         |
| Residual variance                                     | 0.313***      |         | 0.313***      |          | 0.313***      |         | 0.312***      |        | 0.312***      |         |
| <i>Goodness-of-fit</i>                                |               |         |               |          |               |         |               |        |               |         |
| AIC                                                   | 15255.84      |         | 15259.75      |          | 15070.02      |         | 15022.39      |        | 15005.05      |         |
| BIC                                                   | 15401.02      |         | 15474.07      |          | 15325.82      |         | 15305.84      |        | 15329.99      |         |

**Table S7. Growth curve modeling predicting cognitive function by childhood lead exposure, adult education and health outcomes without imputed cognitive values, Health and Retirement study, 1998-2016 (N=6,218 person-wave observations). AIC = Akaike information criterion; BIC = Bayesian information criterion; ref. = reference; \*p < .05. \*\*p < .01. \*\*\*p < .001.**

|                                                       | Model 0         |               | Model 1         |               | Model 2         |               | Model 3         |               | Model 4         |               |
|-------------------------------------------------------|-----------------|---------------|-----------------|---------------|-----------------|---------------|-----------------|---------------|-----------------|---------------|
|                                                       | Intercept       | Slope         |
| <i>Fixed Effects</i>                                  |                 |               |                 |               |                 |               |                 |               |                 |               |
| Age (centered)                                        | -0.052***       |               | -0.056***       |               | -0.050***       |               | -0.065***       |               | -0.073***       |               |
| Age-squared                                           | -0.001***       |               | -0.001***       |               | -0.001***       |               | -0.001***       |               | -0.001***       |               |
| Lead                                                  | 0.093           | 0.001         | 0.106*          | 0.001         | 0.075           | 0.001         | 0.088           | 0.002         | 0.084           | 0.000         |
| Acidic/Alkaline Water                                 | 0.097           | 0.012         | 0.127           | 0.011         | 0.131           | 0.013         | 0.137           | 0.013         | 0.149           | 0.014         |
| <b>Lead X Acidic/Alkaline Water</b>                   | <b>-0.406**</b> | <b>-0.008</b> | <b>-0.515**</b> | <b>-0.007</b> | <b>-0.394**</b> | <b>-0.010</b> | <b>-0.388**</b> | <b>-0.008</b> | <b>-0.400**</b> | <b>-0.008</b> |
| <i>Educational Attainment (ref.= &lt;High School)</i> |                 |               |                 |               |                 |               |                 |               |                 |               |
| High School                                           |                 |               |                 |               | 0.441***        | -0.010        | 0.392***        | -0.012        | 0.400***        | -0.010        |
| Some College                                          |                 |               |                 |               | 0.667***        | -0.008        | 0.591***        | -0.011        | 0.599***        | -0.009        |
| College +                                             |                 |               |                 |               | 0.919***        | -0.003        | 0.783***        | -0.011        | 0.788***        | -0.009        |
| Income                                                |                 |               |                 |               |                 |               | 0.022***        | 0.001         | 0.022***        | 0.001         |
| Wealth                                                |                 |               |                 |               |                 |               | 0.025***        | 0.002*        | 0.024***        | 0.002*        |
| Stroke                                                |                 |               |                 |               |                 |               |                 |               | -0.129*         | -0.011        |
| Hypertension                                          |                 |               |                 |               |                 |               |                 |               | 0.020           | 0.012**       |
| Heart diseases                                        |                 |               |                 |               |                 |               |                 |               | 0.009           | 0.004         |
| <i>Covariates</i>                                     |                 |               |                 |               |                 |               |                 |               |                 |               |
| Female                                                | 0.156**         | -0.002        | 0.154**         | -0.002        | 0.220***        | -0.002        | 0.240***        | 0.000         | 0.237***        | 0.001         |
| <i>Race/Ethnicity (ref.=NH-White)</i>                 |                 |               |                 |               |                 |               |                 |               |                 |               |
| Non-Hispanic, Black                                   | -0.617***       | -0.016*       | -0.512***       | -0.018*       | -0.420***       | -0.016*       | -0.334***       | -0.012        | -0.348***       | -0.014        |
| Hispanic                                              | -0.147          | -0.017        | -0.161          | -0.017        | -0.061          | -0.017        | -0.030          | -0.015        | -0.039          | -0.017        |
| Other                                                 | -0.662*         | -0.015        | -0.638*         | -0.015        | -0.311          | 0.014         | -0.242          | -0.008        | -0.244          | -0.001        |
| <i>Childhood SES (ref.=0)</i>                         |                 |               |                 |               |                 |               |                 |               |                 |               |
| 1                                                     |                 |               | -0.017          | 0.004         | 0.071           | 0.004         | 0.067           | 0.004         | 0.069           | 0.004         |
| 2                                                     |                 |               | -0.043          | 0.009         | 0.121           | 0.011         | 0.120           | 0.011         | 0.118           | 0.011*        |
| 3+                                                    |                 |               | -0.014          | 0.003         | 0.151**         | 0.002         | 0.155*          | 0.002         | 0.148*          | 0.001         |
| Poor Childhood Health                                 |                 |               | -0.126          | 0.005         | -0.018          | 0.006         | -0.002          | 0.008         | 0.002           | 0.008         |
| Southern Born                                         |                 |               | -0.210**        | 0.003         | -0.164*         | 0.003         | -0.168**        | 0.003         | -0.158*         | 0.004         |
| Intercept                                             | 0.211***        |               | 0.253***        |               | -0.448***       |               | -0.687***       |               | -0.689***       |               |
| <i>Variance components</i>                            |                 |               |                 |               |                 |               |                 |               |                 |               |
| Variance of random intercept                          | 0.393***        |               | 0.387***        |               | 0.315***        |               | 0.304***        |               | 0.301***        |               |
| Variance of random slope                              | 0.001***        |               | 0.001***        |               | 0.001***        |               | 0.001***        |               | 0.001***        |               |
| Residual variance                                     | 0.359***        |               | 0.359***        |               | 0.359***        |               | 0.358***        |               | 0.357***        |               |
| <i>Goodness-of-fit</i>                                |                 |               |                 |               |                 |               |                 |               |                 |               |
| AIC                                                   | 13539.73        |               | 13540.48        |               | 13399.29        |               | 13358.90        |               | 13348.66        |               |
| BIC                                                   | 13681.17        |               | 13749.27        |               | 13648.49        |               | 13635.05        |               | 13665.22        |               |



**Table S8. Growth curve modeling predicting learning task, working memory, and attention and processing speed tests by childhood lead exposure, adult education and health outcomes, Health and Retirement study, 1998-2016 (N=6,218 person-wave observations).** Model 1 regresses trajectories of cognitive functioning on childhood lead exposure net of age, sex, race/ethnicity, childhood SES, childhood health, and region of birth. Model 2 adds educational attainment to Model 1. Model 3 adds income and wealth to Model 2. Model 4 adds stroke, hypertension, and heart diseases to Model 3. \*p < .05. \*\*p < .01. \*\*\*p < .001.

| <b>Panel A</b>                      |                | <b>Verbal Memory: Immediate and Delayed Word Recall</b>   |                |        |                |        |                |        |  |
|-------------------------------------|----------------|-----------------------------------------------------------|----------------|--------|----------------|--------|----------------|--------|--|
|                                     | <b>Model 1</b> |                                                           | <b>Model 2</b> |        | <b>Model 3</b> |        | <b>Model 4</b> |        |  |
|                                     | Intercept      | Slope                                                     | Intercept      | Slope  | Intercept      | Slope  | Intercept      | Slope  |  |
| Lead                                | 0.076          | 0.002                                                     | 0.046          | 0.002  | 0.057          | 0.002  | 0.052          | 0.001  |  |
| Acidic/Alkaline Water               | 0.064          | 0.008                                                     | 0.053          | 0.010  | 0.058          | 0.009  | 0.073          | 0.010  |  |
| <b>Lead X Acidic/Alkaline Water</b> | <b>-0.342*</b> | -0.007                                                    | <b>-0.221</b>  | -0.009 | <b>-0.218</b>  | -0.007 | <b>-0.231</b>  | -0.007 |  |
| <b>Panel B</b>                      |                | <b>Working Memory: Serial 7s</b>                          |                |        |                |        |                |        |  |
|                                     | <b>Model 1</b> |                                                           | <b>Model 2</b> |        | <b>Model 3</b> |        | <b>Model 4</b> |        |  |
|                                     | Intercept      | Slope                                                     | Intercept      | Slope  | Intercept      | Slope  | Intercept      | Slope  |  |
| Lead                                | 0.118*         | 0.001                                                     | 0.087          | 0.001  | 0.098*         | 0.001  | 0.096*         | 0.001  |  |
| Acidic/Alkaline Water               | 0.226          | 0.012                                                     | 0.206          | 0.015  | 0.209          | 0.014  | 0.210          | 0.014  |  |
| <b>Lead X Acidic/Alkaline Water</b> | <b>-0.485*</b> | -0.003                                                    | <b>-0.342*</b> | -0.007 | <b>-0.339*</b> | -0.004 | <b>-0.342*</b> | -0.003 |  |
| <b>Panel C</b>                      |                | <b>Attention and Processing Speed: Counting Backwards</b> |                |        |                |        |                |        |  |
|                                     | <b>Model 1</b> |                                                           | <b>Model 2</b> |        | <b>Model 3</b> |        | <b>Model 4</b> |        |  |
|                                     | Intercept      | Slope                                                     | Intercept      | Slope  | Intercept      | Slope  | Intercept      | Slope  |  |
| Lead                                | 0.010          | 0.005                                                     | 0.007          | 0.005  | 0.011          | 0.005  | 0.006          | 0.004  |  |
| Acidic/Alkaline Water               | -0.033         | -0.003                                                    | +0.057         | -0.003 | -0.057         | -0.004 | -0.055         | -0.003 |  |
| <b>Lead X Acidic/Alkaline Water</b> | <b>0.016</b>   | -0.004                                                    | <b>0.062</b>   | -0.004 | <b>0.063</b>   | -0.003 | <b>0.057</b>   | -0.003 |  |

**Table S9. Comparison of HRS demographic, socioeconomic, and health variables between participants included in our sample and participants excluded due to census linkage and missing data.** Statistical tests of difference: Categorical variables assessed with Pearson Chi-Square Test; Continuous variable means assessed with Two Sample T-Test. Our sample includes HRS participants born 1924-1940 who were successfully linked to the 1940 Census and who had at least one observation in our covariates. We compare our sample with those born 1924-1940 who were excluded due to failed census linkage or missing data. \*p<0.05, \*\* p<0.01, \*\*\* p<0.001.

|                            | Participants Excluded<br>due to Census Linkage<br>and Missing Data<br>N=18,976 | Participants Linked to<br>the 1940 Census<br>with Valid Data<br>N=1,089 | p-<br>value |
|----------------------------|--------------------------------------------------------------------------------|-------------------------------------------------------------------------|-------------|
| TICS Score (0-27)          | 14.86 (4.97)                                                                   | 17.29 (4.02)                                                            | ***         |
| Age (57-93)                | 70.47 (9.31)                                                                   | 65.49 (5.01)                                                            | ***         |
| Female (%)                 | 54.84%                                                                         | 50.69%                                                                  | **          |
| Race/Ethnicity (%)         |                                                                                |                                                                         | ***         |
| Non-Hispanic, White        | 78.93%                                                                         | 88.89%                                                                  |             |
| Non-Hispanic, Black        | 15.45%                                                                         | 7.99%                                                                   |             |
| Hispanic                   | 3.45%                                                                          | 2.30%                                                                   |             |
| Other                      | 2.18%                                                                          | 0.83%                                                                   |             |
| Childhood SES (%)          |                                                                                |                                                                         | ***         |
| 0                          | 35.76%                                                                         | 45.55%                                                                  |             |
| 1                          | 21.75%                                                                         | 24.24%                                                                  |             |
| 2                          | 23.34%                                                                         | 17.26%                                                                  |             |
| 3+                         | 19.11%                                                                         | 12.95%                                                                  |             |
| Poor Childhood Health (%)  | 6.36%                                                                          | 7.07%                                                                   |             |
| Southern Born (%)          | 42.17%                                                                         | 16.53%                                                                  | ***         |
| Educational Attainment (%) |                                                                                |                                                                         | ***         |
| < High School              | 35.61%                                                                         | 12.30%                                                                  |             |
| High School                | 33.38%                                                                         | 39.12%                                                                  |             |
| Some College               | 16.64%                                                                         | 20.75%                                                                  |             |
| College +                  | 14.37%                                                                         | 27.82%                                                                  |             |
| Income (logged)            | 5.09 (2.75)                                                                    | 6.26 (2.62)                                                             | ***         |
| Wealth (logged)            | 5.56 (2.87)                                                                    | 6.43 (2.68)                                                             | ***         |
| Ever Had Stroke (%)        | 9.16%                                                                          | 4.41%                                                                   | ***         |
| Ever had hypertension      | 47.40%                                                                         | 41.05%                                                                  | ***         |
| Ever had heart diseases    | 24.76%                                                                         | 15.98%                                                                  | ***         |

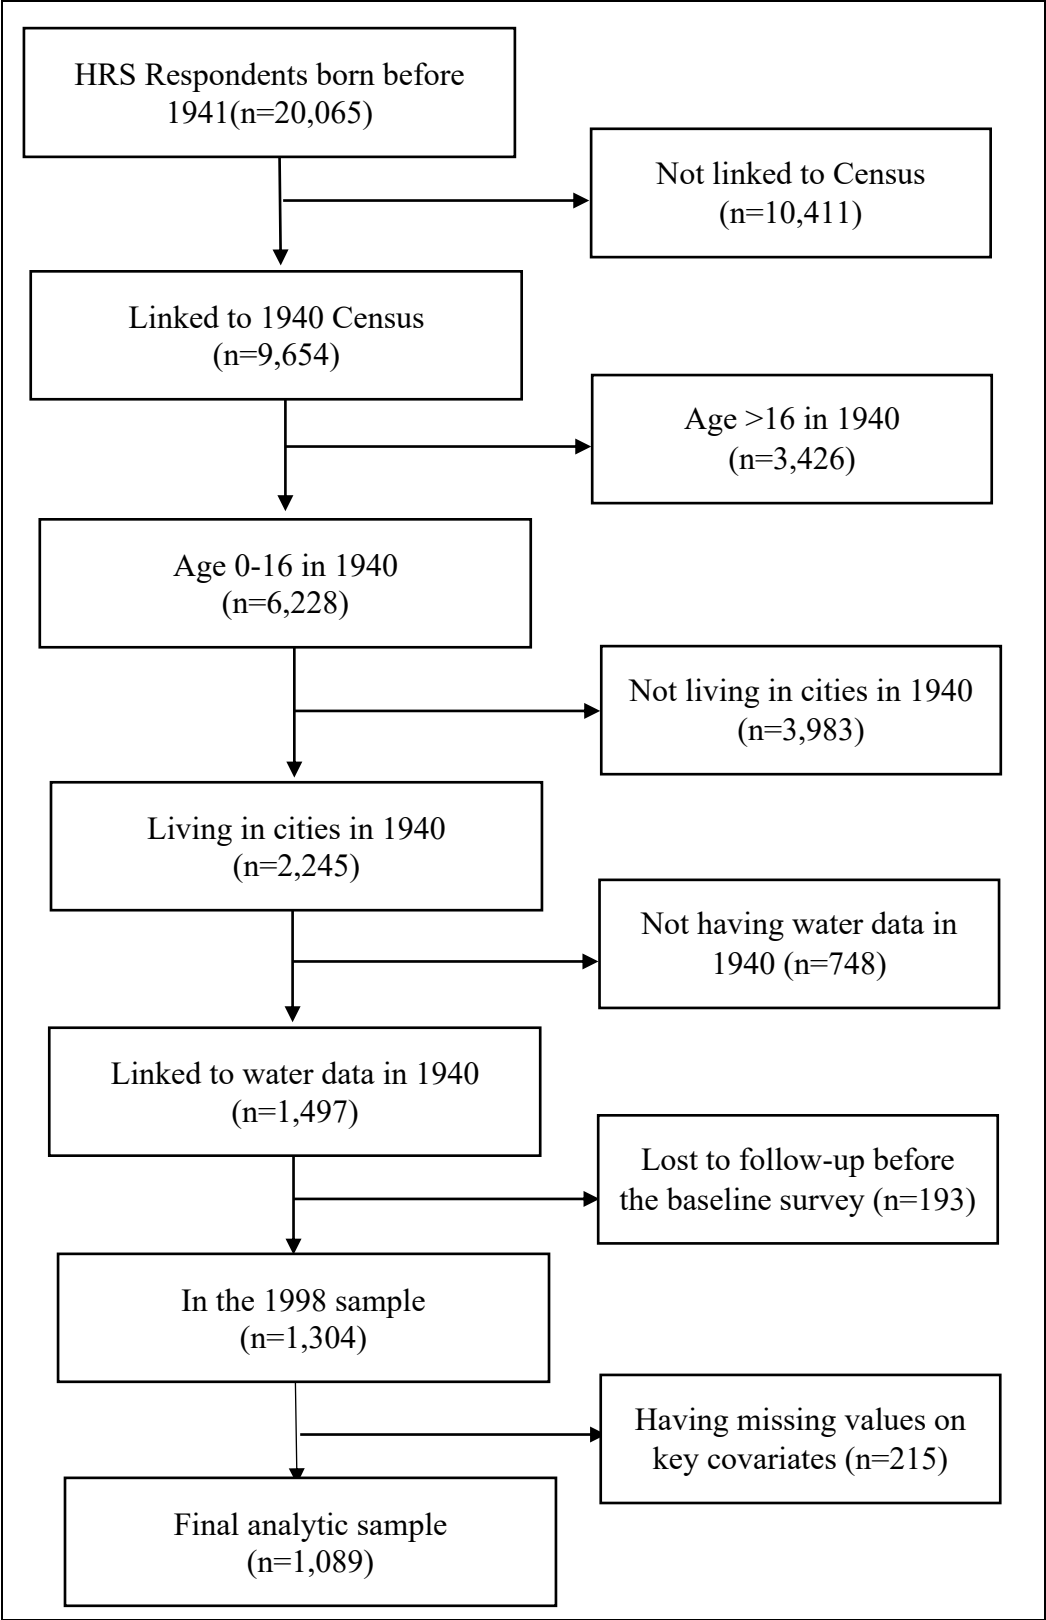

**Fig. S1. Attrition chart, Health and Retirement Study, 1998-2016 (N=1,089).**
